# Supplementary figures and images for: Oxidative Stress and DNA Damage in Pagrus major by the Dinoflagellate Karenia mikimotoi
Source: MDPI journal article supplement (doi:10.3390/toxins15100620), 2023-10-19

## Supplementary Figure S1

### The detailed experimental protocol

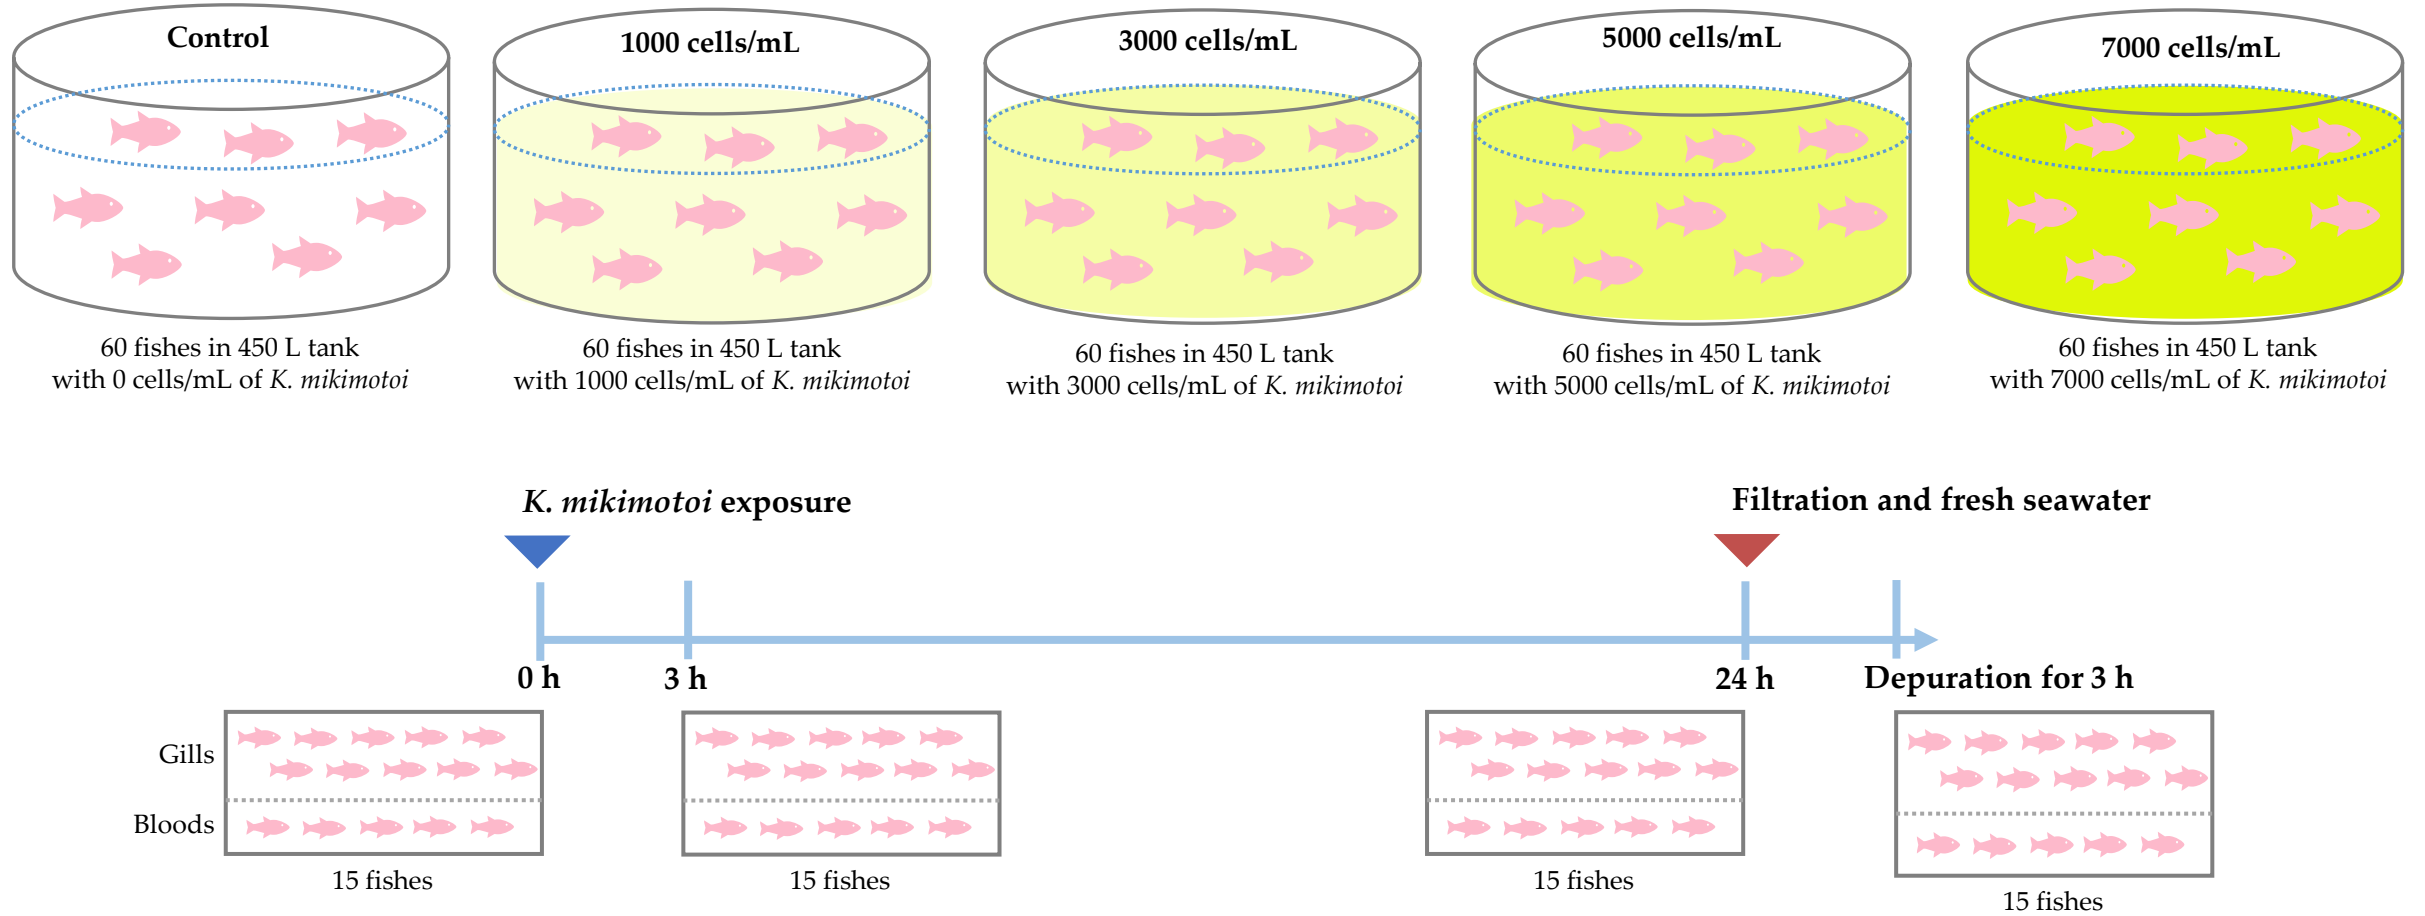

Supplement: s1 [file s1]
